# Disordered eating and self-harm as risk factors for poorer mental health during the COVID-19 pandemic: A population-based cohort study

Naomi Warne<sup>1\*</sup>, Jon Heron<sup>1</sup>, Becky Mars<sup>1</sup>, Alex S. F. Kwong<sup>2,3,4</sup>, Francesca Solmi<sup>5</sup>, Rebecca Pearson<sup>1,3</sup>, Paul Moran<sup>1</sup>, Helen Bould<sup>1,3,6</sup>

<sup>1</sup> Centre for Academic Mental Health, Population Health Sciences, Bristol Medical School, University of Bristol, UK

<sup>2</sup> Population Health Sciences, Bristol Medical School, University of Bristol, UK

<sup>3</sup> MRC Integrative Epidemiology Unit, Bristol Medical School, University of Bristol, UK

<sup>4</sup> Division of Psychiatry, Centre for Clinical Brain Sciences, University of Edinburgh, UK

<sup>5</sup> UCL Division of Psychiatry, UK

<sup>6</sup> Gloucestershire Health and Care NHS Foundation Trust, Gloucester, UK

## **\*Corresponding author:**

Dr Naomi Warne

Centre for Academic Mental Health, Population Health Sciences,

University of Bristol

Oakfield House

Oakfield Grove

Bristol

BS8 2BN

Email: [naomi.warne@bristol.ac.uk](mailto:naomi.warne@bristol.ac.uk)

ORCID iD: <https://orcid.org/0000-0001-6160-8982>

NOTE: This preprint reports new research that has not been certified by peer review and should not be used to guide clinical practice.

## 1 Abstract

2 **Background:** Young adults and especially those with pre-existing mental health conditions, such as  
3 disordered eating and self-harm, appear to be at greater risk of developing mental health problems  
4 during the COVID-19 pandemic. However, it is unclear whether this increased risk is affected by any  
5 changes in lockdown restrictions, and whether any lifestyle changes could moderate this increased  
6 risk.

7 **Methods:** In a longitudinal UK population-based cohort (The Avon Longitudinal Study of Parents  
8 and Children, ALSPAC) we assessed the relationship between pre-pandemic measures of disordered  
9 eating and self-harm and mental health during the COVID-19 pandemic in 2,657 young adults.  
10 Regression models examined the relationship between self-reported disordered eating, self-harm, and  
11 both disordered eating and self-harm at age 25 years and depressive symptoms, anxiety symptoms and  
12 mental wellbeing during a period of eased restrictions in the COVID-19 pandemic (May-July 2020)  
13 when participants were aged 27-29 years. Analyses were adjusted for sex, questionnaire completion  
14 date, pre-pandemic socioeconomic disadvantage and pre-pandemic mental health and wellbeing. We  
15 also examined whether lifestyle changes (sleep, exercise, alcohol, visiting green space, eating, talking  
16 with family/friends, hobbies, relaxation) in the initial UK lockdown (April-May 2020) moderated  
17 these associations.

18 **Results:** Pre-existing disordered eating, self-harm and comorbid disordered eating and self-harm were  
19 all associated with the reporting of a higher frequency of depressive symptoms and anxiety symptoms,  
20 and poorer mental wellbeing during the pandemic compared to individuals without disordered eating  
21 and self-harm. Associations remained when adjusting for pre-pandemic mental health measures.  
22 There was little evidence that interactions between disordered eating and self-harm exposures and  
23 lifestyle change moderators affected pandemic mental health and wellbeing.

24 **Conclusions:** Young adults with pre-pandemic disordered eating, self-harm and comorbid disordered  
25 eating and self-harm are at increased risk for developing symptoms of depression, anxiety and poor  
26 mental wellbeing during the COVID-19 pandemic, even when accounting for pre-pandemic mental

27 health. Lifestyle changes during the pandemic do not appear to alter this risk. A greater focus on rapid  
28 and responsive service provision is essential to reduce the impact of the pandemic on the mental  
29 health of these already vulnerable individuals.

### 30 [Keywords](#)

31 ALSPAC; COVID-19; disordered eating; self-harm; mental health; pandemic; lockdown;

### 32 [Plain English summary](#)

33 The aim of this project was to explore the mental health of young adults with disordered eating  
34 behaviours (such as fasting, vomiting/taking laxatives, binge-eating and excessive exercise) and self-  
35 harm during the COVID-19 pandemic. We analysed data from an established study that has followed  
36 children from birth (in 1991 and 1992) up to present day, including during the pandemic when  
37 participants were 28 years old. We looked at the relationship between disordered eating and/or self-  
38 harm behaviours from *before* the pandemic and mental health problems (symptoms of depression and  
39 anxiety) and mental wellbeing *during* the pandemic. We also explored whether there were any  
40 lifestyle changes (such as changes in sleep, exercise, visiting green space) that might be linked to  
41 better mental health and wellbeing in young adults with disordered eating and self-harm. We found  
42 that young adults with prior disordered eating and/or self-harm had more symptoms of depression and  
43 anxiety, and worse mental wellbeing than individuals without prior disordered eating or self-harm.  
44 However, lifestyle changes did not appear to affect mental health and wellbeing in these young adults.  
45 Our findings suggest that people with a history of disordered eating and/or self-harm are at high risk  
46 for developing mental health problems during the pandemic, and they will need help from mental  
47 health services.

## 48 Background

49 The coronavirus disease 2019 (COVID-19) pandemic has had an immense impact on people's lives  
50 worldwide. On 23<sup>rd</sup> March 2020, a national lockdown was announced as a UK public health strategy  
51 instructing the public to stay at home except for certain limited purposes. During this time, people  
52 could only leave their homes once a day for one hour for exercise or shopping for essential goods (e.g.  
53 food, medicine). Non-essential businesses were closed, schools were closed for the majority of  
54 students (exceptions were for vulnerable children and children of keyworkers), and people were urged  
55 to work from home where possible. Restrictions were gradually eased, allowing for unlimited exercise  
56 outside (13<sup>th</sup> May 2020), groups of up to six people to meet outside with social distancing (1<sup>st</sup> June  
57 2020), year groups returning to schools (1<sup>st</sup> June 2020), and non-essential shops re-opening (15<sup>th</sup> June  
58 2020). The pandemic and associated restrictions radically changed people's lives and there is  
59 evidence that mental health in the UK population was worse during lockdown than before the  
60 pandemic (1–4). Furthermore, young adults and individuals with prior mental health problems were at  
61 increased risk of common mental health problems (depressive symptoms and anxiety symptoms)  
62 during the UK lockdown (1).

63 Young adults with pre-existing common mental health problems are likely to be at particularly high  
64 risk of experiencing poor mental health during the pandemic. Eating disorder behaviours and self-  
65 harm are common in young adults (5) and are associated with increased risk of mortality and  
66 psychiatric comorbidity (6–9). They commonly co-occur in clinical (10) and general population (5)  
67 samples, and this comorbidity is a great clinical concern as it increases the risk of poorer overall  
68 mental health (11–13) and risk for suicide (14), compared with when the behaviours occur in  
69 isolation. Furthermore, there is growing concern that individuals with a history of eating disorders  
70 and/or self-harm may have been particularly affected by the pandemic and the associated restrictions.  
71 In addition to the broader risk factors that can affect many people (for instance social isolation,  
72 stressful life events) individuals with eating disorders may experience more specific risk factors that  
73 can lead to increased distress such as changes in access to food, exercise limitations, media messaging  
74 and restricted healthcare access (15,16). Individuals with disordered eating are also likely to

75 experience some of these more specific risk factors. Similarly, the pandemic has resulted in a number  
76 of exacerbating factors for self-harm (17) and the reductions of clinical services presentations for self-  
77 harm may reflect reduced help-seeking in this vulnerable group (18,19). Given these additional risk  
78 factors, individuals with eating disorders and self-harm may be a key ‘at risk’ group for poorer mental  
79 health (such as depression and anxiety) during the pandemic. Prior research has found that disordered  
80 eating and self-harm are risk factors for increased depressive and anxiety symptoms in young adults  
81 during the first UK lockdown (1). However, it is unclear whether this increased risk persists when  
82 lockdown restrictions have eased, and whether lifestyle factors could play a role in this risk.

83 To date, there has been limited published research on COVID-19-related common mental health  
84 outcomes in individuals with eating disorders and self-harm. One cross-sectional Australian study  
85 found that individuals self-reporting an eating disorder had higher levels of depression, anxiety and  
86 stress than individuals not reporting an eating disorder in April 2020 (20). Cross-sectional studies  
87 have found the majority of participants with eating disorders have also self-reported a worsening of  
88 depressive symptoms (21) and anxiety symptoms (22,23) due to the pandemic, however a longitudinal  
89 study found no change in general psychopathology (including depression and anxiety) pre- to post-  
90 lockdown in eating disorder patients (24). There is very limited research for pandemic common  
91 mental health problems in those with a history of self-harm but there is emerging evidence that  
92 individuals with a previous history of self-harm with suicidal intent (suicide attempt) were more likely  
93 to have depression in a Greek lockdown (April-May 2020) than those without a history of suicide  
94 attempt (25).

95 Although informative, conclusions from these studies are limited by the self-selected participants, the  
96 small sample sizes (typically under ~200 people) and the retrospective reporting of changes in mental  
97 health. Furthermore, many studies focus on clinical samples, whereas only a minority of individuals  
98 with disordered eating and self-harm seek help (6,26). Research using longitudinal population-based  
99 samples with pre-pandemic measures of mental health can provide a more accurate representation of  
100 pandemic-related effects on mental health in these groups. Such samples include a more

101 representative sample of participants than those found from convenience sampling and include  
102 participants with disordered eating or self-harm who may be missed by clinical services.

103 In this study, we used a UK general population cohort 1) to investigate whether prior disordered  
104 eating and self-harm were risk factors for higher levels of depression and anxiety and lower levels of  
105 mental wellbeing during a period of eased restrictions in the COVID-19 pandemic; and 2) to assess  
106 whether lifestyle changes can identify individuals with prior disordered eating and self-harm who may  
107 have better mental health in the pandemic.

## 108 [Methods](#)

### 109 [Sample](#)

110 We analysed data on young adults from a population-based birth cohort: The Avon Longitudinal  
111 Study of Parents and Children (ALSPAC) (27–29). Pregnant women living in the Avon area of Bristol  
112 (UK) with an expected delivery date between 1<sup>st</sup> April 1991 and 31<sup>st</sup> December 1992 were invited to  
113 take part in the study. 14,541 pregnant women were enrolled in ALSPAC and had completed at least  
114 one assessment (questionnaire or in person clinic) by 19<sup>th</sup> July 1999. This resulted in 14,062 live  
115 births, and 13,988 children who were alive at 1 year of age. We used data on offspring from this core  
116 sample only. Ethical approval for the study was obtained from the ALSPAC Ethics and Law  
117 Committee and the Local Research Ethics Committees.

118 Data were collected at multiple time points and from multiple informants via regular questionnaires  
119 and face-to-face assessments at research clinics. Some of these data were collected and managed  
120 using REDCap electronic data capture tools (30,31). Please note that the study website contains  
121 details of all the data that is available through a fully searchable data dictionary and variable search  
122 tool: <http://www.bristol.ac.uk/alspac/researchers/our-data/>. In this study, we focused on exposures of  
123 disordered eating and self-harm behaviours reported by participants *before* the pandemic at age 25  
124 years, and additional data on other health characteristics, collated from two online questionnaires sent  
125 following UK lockdown (which started on 23rd March 2020). Mental health and wellbeing outcomes  
126 were self-reported during a period of eased restrictions (26th May - 4th July 2020) in the COVID-19

127 pandemic when participants were age 28 years (32). We also looked at self-reported lifestyle changes  
128 during the initial UK lockdown (9th April - 15th May 2020) (33) as potential moderators of this  
129 relationship (see timeline of assessments in Figure 1).

130 We conducted our primary analyses on an imputed sample of 2657 individuals (1891 (71.17%)  
131 females, 766 (28.83%) males) who completed questions on lifestyle changes during the pandemic (see  
132 Supplementary Figure 1 for flowchart of attrition). Responders to this survey were more likely than  
133 non-responders to be female, white, in education, employment or training prior to the pandemic, and  
134 have a higher maternal education and have parents who owned a home around birth (see  
135 Supplementary Table 1).

### 136 Exposures

137 Disordered eating and self-harm were self-reported via questionnaire at age 25 (“YPD”  
138 questionnaire). Age at completion ranged from 23.8 years to 26.3 years with a mean age of 24.8 (SD  
139 0.5) years.

### 140 *Disordered eating*

141 Disordered eating was measured using the Youth Risk Behaviour Surveillance System questionnaire  
142 (34). We used questions about behaviours in the last year to lose weight or avoid gaining weight: 1)  
143 fasting for at least a day; 2) purging (vomiting or taking laxatives/other medications); 3) excessive  
144 exercise (exercise that frequently interfered with daily routine/work, or frequently exercising even  
145 when sick/injured); as well as 4) binge-eating with a sense of loss of control. Our primary exposure of  
146 interest was *any disordered eating*, a composite measure derived for any report of fasting, purging,  
147 excessive exercise or binge-eating at any frequency. Secondary exposures of interest were each of the  
148 individual disordered eating behaviours (fasting, purging, binge-eating, excessive exercise) at any  
149 frequency, and a composite measure of any of these behaviours at least once a week in line with  
150 diagnostic criteria (35): *DSM-5 disordered eating*. Questions, possible responses and variable  
151 derivation are presented in Supplementary Table 2.

152 *Self-harm*

153 We assessed self-harm using questions adapted from the Child and Adolescent Self-Harm in Europe  
154 study (36). We used self-harm behaviour in the last year, in order to be comparable with our measures  
155 of disordered eating. Participants were asked a series of questions about the presence and frequency of  
156 self-harm behaviours (see Supplementary Table 2). Our primary exposure of interest was *any self-*  
157 *harm*, regardless of suicidal intent, in the past year. This was derived from questions asking whether  
158 participants had hurt themselves on purpose in any way and how many times they did this in the last  
159 year. Secondary exposures of interest were *self-harm without suicidal intent* and *self-harm with*  
160 *suicidal intent (suicidal attempt)*. Self-harm without suicidal intent was reported if, when asked the  
161 question “when was the last time you hurt yourself on purpose, without intending to kill yourself?”,  
162 they responded with “in the last week”, or “more than a week ago but in the last year”. Similarly,  
163 participants with those responses to the question “when was the last time you hurt yourself on purpose  
164 and you seriously wanted to kill yourself?” were recorded as having *self-harm with suicidal intent*.  
165 Participants could therefore report both self-harm *with* suicidal intent and self-harm *without* suicidal  
166 intent in the last year.

167 *Comorbid disordered eating and self-harm*

168 Individuals who reported *any disordered eating* (at any frequency) and *any self-harm* were coded as  
169 having comorbid disordered eating and self-harm behaviours.

170 *Outcomes*

171 Outcomes were taken from the second COVID-19-related questionnaire (“COVID2” questionnaire)  
172 which was sent to participants during a period of eased restrictions between 26th May and 4th July  
173 2020. Participants were aged 27-29 years at completion (mean (SD) = 28.2 (0.5) years).

174 *Depressive symptoms during the COVID-19 pandemic*

175 Depressive symptoms were measured using the short version of the Mood and Feelings Questionnaire  
176 (sMFQ) (37). Participants reported whether 13 depressive symptom statements were ‘not true’ (0),  
177 ‘sometimes true’ (1), and ‘true’ (2) for the previous 2 weeks. Scores were summed (possible range 0-  
178 26) with higher scores indicating more depressive symptoms.



179 *Anxiety symptoms during the COVID-19 pandemic*

180 Anxiety symptoms were measured on the Generalised Anxiety Disorder 7-item questionnaire (GAD-  
181 7) (38). Participants reported whether they had been bothered by each of the 7 anxiety statements in  
182 the past 2 weeks on the response scale ‘not at all’ (0), ‘several days’ (1), ‘more than half the days’ (2),  
183 and ‘nearly every day’ (3). These responses were summed for a total score with possible range 0-21,  
184 with higher scores indicating higher levels of anxiety.

185 *Mental wellbeing during the COVID-19 pandemic*

186 Mental wellbeing was measured on the Warwick-Edinburgh Mental Well-Being Scale (WEMWBS)  
187 (39). This consisted of 14 wellbeing statements that participants rated over the past 2 weeks on a scale  
188 of ‘none of the time’ (1), ‘rarely’ (2), ‘some of the time’ (3), ‘often’ (4), and ‘all of the time’ (5).  
189 Summed scores produced a possible range of 14-70 with lower scores indicating poorer mental  
190 wellbeing.

191 *Moderating factors*

192 Participants reported on a number of lifestyle changes that occurred after the first UK lockdown was  
193 announced (23<sup>rd</sup> March 2020) in the first online COVID-19-related questionnaire (“COVID1”  
194 questionnaire) (10). This questionnaire was sent during lockdown between 9th April and 15th May  
195 2020 (mean (SD) age = 28.1 (0.5) years). Questions about lifestyle changes included changes in the  
196 amount of sleep, exercise, alcohol drunk, visiting green space, practising  
197 relaxation/mindfulness/mediation, eating, as well as changes in time spent talking to family/friends  
198 outside their home and time spent doing hobbies/things they enjoy. Participants reported whether the  
199 amount they did each activity had “decreased”, “stayed the same”, “increased” or was “not  
200 applicable” since the first UK lockdown (23<sup>rd</sup> March 2020). For our analyses we combined “not  
201 applicable” with “stayed the same” as we made the assumption that the majority of people responding  
202 “not applicable” likely maintained an absence of the activity.

## 203 Confounders and descriptive variables

204 Based on their plausible associations with exposures, outcomes and moderating factors, we adjusted  
205 for hypothesised confounders of sex, completion date of the COVID1 questionnaire, pre-pandemic  
206 socioeconomic status and baseline mental health symptoms. Participation in education, employment  
207 or training activities was used as the pre-pandemic indicator of socioeconomic status, with those not  
208 in education, employment, or training (NEET) designated as being in the socioeconomic disadvantage  
209 category. Participants reported on their education and employment status, prior to the pandemic  
210 (2015-2016) at age 24 years. For baseline mental health symptoms, we used the most recent reports  
211 on the same questionnaires preceding the disordered eating and self-harm exposures (age 25). For  
212 depressive symptoms (sMFQ) and mental wellbeing (WEMWBS) this was at age 24 years and for  
213 anxiety symptoms (GAD-7) this was at age 22 years. Timings of all exposures, outcomes and  
214 confounders are presented in Figure 1.

215 We also described the sample's sociodemographic characteristics, and pandemic-related experiences,  
216 the latter were measured on the COVID2 questionnaire. Participants were categorised as *living alone*  
217 if they responded "no I live on my own" to the question "Do you live with anyone?". Participants  
218 were defined as a *keyworker* if they responded "yes" to the question: "Are you a keyworker, or has  
219 your work been classified as critical to the COVID-19 response?". Participants were considered to be  
220 *furloughed during the pandemic* if they responded "yes" to the question: "Which of these would you  
221 say best describes your current situation now?: Employed but on paid leave (including furlough)". For  
222 pandemic financial situation, participants were asked: "Overall, how do you feel your current  
223 financial situation compares to how it was before the COVID-19 pandemic?" with possible responses  
224 of "I'm much worse off", "I'm a little worse off", "I'm about the same", "I'm a little better off", "I'm  
225 much better off". Individuals responding "I'm much worse off" and "I'm a little worse off" were  
226 coded as having *financial problems during the pandemic*.

## 227 Analysis

228 All analyses were performed in Stata version 16 (40). First, we described the samples in terms of sex,  
229 ethnicity, sociodemographic factors, pandemic-related experiences, and key exposure and outcome

230 variables. Secondly, we used linear regression models to explore the relationship between disordered  
231 eating and self-harm exposures and the three mental health and wellbeing outcomes (depressive  
232 symptoms, anxiety symptoms, mental wellbeing) during a period of eased restrictions in the COVID-  
233 19 pandemic. We focused on our primary exposures of *any disordered eating*, *any self-harm* and  
234 *comorbid disordered eating and self-harm*. Analyses were repeated with secondary exposures of  
235 specific types of disordered eating (fasting, purging, excessive exercise, binge eating, DSM-5  
236 disordered eating) and self-harm with and without suicidal intent. We conducted these analyses  
237 unadjusted for confounders (Model A) and with sequential adjustment to assess the effects of  
238 confounders. We progressively adjusted for: sex, COVID1 questionnaire completion date, pre-  
239 pandemic NEET status (Model B); and corresponding baseline mental health symptoms/wellbeing  
240 (Model C). We examined whether the association between exposure and outcome varied depending  
241 on changes in lifestyle factors by testing whether there was evidence of an interaction between  
242 lifestyle change and disordered eating status, and lifestyle change and self-harm status on pandemic  
243 mental health and wellbeing. To aid in interpretation of interaction results we also examined the  
244 association between disordered eating and self-harm exposures and lifestyle change moderators, as  
245 well as associations between lifestyle change factors and pandemic-related mental health outcomes.

#### 246 *Missing data*

247 Primary analyses were conducted on an imputed dataset of 2657 individuals with complete data on  
248 lifestyle change moderators measured on the COVID1 questionnaire. Missing data on primary  
249 exposures, outcomes, and confounders were imputed (see Supplementary Table 3 for amount of  
250 missing data). Secondary exposures were not imputed, and we did not impute data on lifestyle  
251 changes in COVID1 questionnaire or pandemic-related descriptive factors as these data were unique  
252 and unlikely to be explained by auxiliary data in ALSPAC. Data were imputed using the multivariate  
253 imputation by chained equations (MICE) approach (41) under the missing at random (MAR)  
254 assumption. In addition to variables used in the main analysis, we incorporated auxiliary variables  
255 related to the missing data mechanism. Auxiliary variables were disordered eating at 16 and 18 years,  
256 self-harm at 18 and 24 years, Body Mass Index at 18 and 24 years, and mental health and wellbeing  
257 measures from the COVID1 questionnaire. A number of sociodemographic variables collected near

258 birth including maternal age, parity, maternal education, maternal social class, paternal social class,  
259 home ownership status and birthweight were also used. One hundred datasets were imputed (a  
260 decision informed by studying the Monte Carlo errors for the estimated parameters). Separate  
261 multiple imputation models were performed: one model for the main regression models and multiple  
262 imputation models including all interactions (42) to allow for interactions between each exposure and  
263 each lifestyle change variable. We compared estimates from imputed analysis to analysis of observed  
264 data with complete information on disordered eating, self-harm, mental health measures during the  
265 pandemic, lifestyle change moderators, and confounders (see flowchart of attrition, Supplementary  
266 Figure 1).

## 267 Results

### 268 Descriptive results

269 Descriptive information for the imputed and observed samples is presented in Table 1. As can be  
270 seen, the sample was predominantly white and in education, employment or training before the  
271 pandemic. During the pandemic (observed sample), 7.20% were living alone, approximately two in  
272 five (39.66%) participants were keyworkers, one in eight (12.31%) had been furloughed, and a quarter  
273 (24.61%) reported financial problems. At age 25 (imputed sample), 32.04% of the sample reported  
274 some form of disordered eating in the past year, 8.97% reported self-harm in the past year, and 5.53%  
275 reported comorbid disordered eating and self-harm in the past year. The most common specific  
276 disordered eating behaviour (observed sample) was binge-eating (20.46%), whereas the most common  
277 type of self-harm reported was self-harm without suicidal intent (6.19%).

278 *[Table 1 here]*

279 Associations between disordered eating/self-harm and mental health outcomes during the  
280 pandemic

281 Regression models testing the associations between disordered eating and self-harm exposures with  
282 mental health and wellbeing outcomes are presented in Table 2. There was evidence that a history of  
283 any disordered eating, any self-harm, and comorbid disordered eating and self-harm were associated

284 with higher depressive and anxiety symptoms, and lower mental wellbeing during the pandemic.  
285 These associations were present in unadjusted models, and remained unchanged when adjusting for  
286 sex, COVID questionnaire completion date and pre-pandemic NEET status. There was still strong  
287 evidence of these associations after further adjustment for baseline mental health and wellbeing  
288 although the magnitude of the associations was attenuated. Results using imputed data were consistent  
289 with complete case observed data (see Supplementary Table 4).

290 *[Table 2 here]*

291 Broadly similar patterns were detected for analyses with secondary exposures (see Supplementary  
292 Table 5). Subtypes of disordered eating (fasting, purging, binge-eating, any DSM-5 disordered eating)  
293 and self-harm (with and without suicidal intent) were associated with greater depressive symptoms,  
294 greater anxiety symptoms and lower mental wellbeing during the pandemic in unadjusted and in  
295 adjusted models. However, excessive exercise was not associated with pandemic depressive  
296 symptoms and mental wellbeing in fully adjusted models (Supplementary Table 5). In addition, self-  
297 harm without suicidal intent was no longer associated with mental wellbeing in the pandemic when  
298 accounting for baseline mental wellbeing ( $B = -1.28$  (95% CI  $-2.93, 0.37$ ),  $p = 0.127$ ).

### 299 Moderation of lifestyle changes

300 Interaction results are presented in Figure 2 alongside associations between disordered eating/self-  
301 harm exposures and pandemic mental health and wellbeing outcomes stratified by levels of lifestyle  
302 change moderators to aid interpretation (see Supplementary Table 6 for frequencies of each lifestyle  
303 change). As can be seen, irrespective of lifestyle change and outcome, disordered eating and self-harm  
304 are all associated with worse mental health outcomes, but there was little evidence of interaction  
305 effects between lifestyle changes during the pandemic and prior disordered eating (Figure 2a, 2c and  
306 2e) and prior self-harm (Figure 2b, 2d and 2f). There was evidence for one interaction between  
307 disordered eating and sleep on anxiety symptoms (Figure 2c,  $F = 5.07$ ,  $p = 0.006$ ), in that keeping the  
308 same level of sleep was associated with lower levels of anxiety than changes (decreases and increases)  
309 in sleep for those with disordered eating. This pattern of results was also seen for depressive symptom

310 and mental wellbeing outcomes but there was little evidence for interaction effects (depressive  
311 symptoms Figure 2a,  $F = 1.96$ ,  $p = .142$ ; mental wellbeing Figure 2e,  $F = 2.35$ ,  $p = 0.096$ ). There was  
312 an interaction between self-harm and hobbies for anxiety symptoms (Figure 2d,  $F = 3.10$ ,  $p = 0.045$ ),  
313 whereby changes (increases and decreases) in time spent on hobbies was associated with fewer  
314 anxiety symptoms for those with a history of self-harm.

315 There was evidence for some associations between disordered eating and self-harm exposures and  
316 lifestyle changes (Supplementary Table 7), and changes (decreases and increases) in lifestyle were  
317 generally associated with poorer subsequent mental health and wellbeing compared to maintaining the  
318 same level of each lifestyle factor (Supplementary Table 8).

## 319 Discussion

320 In this UK population-based cohort, young adults with a previous history of either disordered eating,  
321 self-harm, or comorbid disordered eating and self-harm, were at increased risk for poor mental health  
322 and wellbeing during the COVID-19 pandemic. Specifically, disordered eating, self-harm and  
323 comorbid disordered eating and self-harm were associated with higher depressive symptoms, higher  
324 anxiety symptoms and poorer mental wellbeing during a period of easing restrictions. Associations  
325 attenuated somewhat with the addition of prior mental health and wellbeing confounders, but there  
326 was still evidence of associations between disordered eating and self-harm exposures and pandemic  
327 mental health outcomes independent of pre-pandemic levels of mental health and wellbeing.  
328 Furthermore, there was limited evidence that any changes in lifestyle (sleep, exercise, drinking  
329 alcohol, visiting green space, eating, talking with family/friends outside the home, hobbies, relaxation  
330 techniques) during lockdown restrictions moderated these relationships. These findings suggest that  
331 young adults with disordered eating and self-harm may need additional help to prevent mental health  
332 problems from developing during the pandemic or for rapid access to treatment.

333 Previous research in this cohort has found individuals with a history of disordered eating (at DSM-5  
334 frequency (35)) and self-harm are associated with higher levels of depressive and anxiety symptoms  
335 during the initial UK lockdown (1). The current study extends these findings to a period of eased

336 restrictions and suggests that individuals with disordered eating and self-harm may be at enduring risk  
337 for common mental health problems throughout the COVID-19 pandemic. Clearly policymakers and  
338 healthcare professionals should be aware that individuals with disordered eating and self-harm are at  
339 greater risk of experiencing worse mental health outcomes during this period of pandemic.

340 Importantly, our results find that the association between a history of disordered eating behaviours  
341 and poorer mental health during the pandemic is not limited to more severe DSM-5 level frequencies  
342 but also extends to any level of disordered eating. Therefore, greater funding for mental health  
343 services should be prioritised to provide help to individuals across a range of severities, as early as  
344 possible to prevent negative effects of enduring mental health problems.

345 We found little evidence that lifestyle changes could moderate these risks. There was weak evidence  
346 for interactions with a number of different lifestyle changes but given the numerous of moderation  
347 tests conducted we are cautious about interpreting this weak evidence. However, we found evidence  
348 for an interaction between disordered eating and sleep on anxiety symptoms, whereby maintaining  
349 pre-pandemic levels of sleep was associated with fewer anxiety symptoms than increases or decreases  
350 in sleep for those with a history of disordered eating. This is difficult to interpret given lifestyle  
351 changes in the pandemic (in this case sleep) are unlikely to be independent of exposures and outcomes  
352 (see Supplementary Tables 7 and 8) and may be affected by concurrent or recent changes in mental  
353 health, employment, and childcare responsibilities. In general, changes in the lifestyle factors assessed  
354 were associated with worse mental health and wellbeing regardless of prior disordered eating or self-  
355 harm (Supplementary Table 8). Future work focusing on factors that promote resilience in these at  
356 risk groups, who are already at elevated risk of mortality (7,9), is warranted. It is not clear what would  
357 be useful for the mental health of young adults with prior disordered eating and self-harm during the  
358 pandemic, but it is likely that access to mental health services will be important. This is difficult in the  
359 context of the pandemic when service use has reduced (43) and, therefore, additional funding that  
360 enables greater service provision, adapted for pandemic-related restrictions, is vital.

361 The strengths of this study include the large sample size, the use of longitudinal data to assess the  
362 effect of the pandemic on mental health by accounting for pre-pandemic mental health and use of

363 population-based participants with impairing disordered eating and self-harm who would normally be  
364 omitted from clinical samples. Nevertheless, the study should be viewed in light of its limitations.  
365 Firstly, we were unable to explore disordered eating and self-harm during the pandemic as there was  
366 no data available for this. Secondly, we used imputed datasets under the assumption that data is  
367 missing at random, which if not true, could mean the results are biased. Furthermore, we only imputed  
368 up to those with complete lifestyle change data on the COVID1 questionnaire and this may limit  
369 generalisability of findings as this sample was more likely to be female, white and have less  
370 socioeconomic disadvantage than those who did not respond to the survey. Thirdly, we did not have  
371 sufficient numbers of people with different ethnic backgrounds to assess the effect of ethnicity on the  
372 relationships between disordered eating, self-harm and pandemic mental health. Fourthly,  
373 interpretation of our moderation results is difficult given lifestyle change moderators are not  
374 independent of the exposures and outcomes, and may be associated with additional factors such as  
375 employment change. Consequently, we were unable to make inferences about the direction of effect,  
376 and this required further exploration. Finally, we did not correct for multiple comparisons due to the  
377 exploratory nature of analyses and the lack of independence of many of the measures. These results  
378 are therefore in need of replication in independent samples.

## 379 Conclusions

380 Individuals with prior disordered eating and self-harm were at increased risk of developing common  
381 mental health problems during the COVID-19 pandemic. There was little evidence to support lifestyle  
382 changes moderating this risk. Further work is needed to identify factors that might increase resilience  
383 among individuals with disordered eating and self-harm during the pandemic in order to prevent them  
384 from developing common mental health problems. Additional funding for mental health services will  
385 likely be important to provide rapid treatment for these at risk young adults.



386 List of abbreviations

387 ALSPAC = Avon Longitudinal Study of Parents and Children; GAD7 = Generalised Anxiety

388 Disorder 7-item questionnaire; MFQ = Mood and Feelings Questionnaire; WEMWBS = Warwick-

389 Edinburgh Mental Well-Being Scale

390

## 391 Declarations

### 392 Ethics approval and consent to participate

393 Ethics approval for the study was obtained from the ALSPAC Ethics and Law Committee and the  
394 Local Research Ethics Committees.

### 395 Consent for publication

396 Not applicable.

### 397 Availability of data and materials

398 ALSPAC data access is through a system of managed open access. The steps below highlight how to  
399 apply for access to the data included in this paper and all other ALSPAC data.

- 400 1. Please read the [ALSPAC access policy \(PDF, 843kB\)](#) which describes the process of  
401 accessing the data and samples in detail, and outlines the costs associated with doing so.
- 402 2. You may also find it useful to browse our fully searchable [research proposals database](#), which  
403 lists all research projects that have been approved since April 2011.
- 404 3. Please [submit your research proposal](#) for consideration by the ALSPAC Executive  
405 Committee. You will receive a response within 10 working days to advise you whether your  
406 proposal has been approved.

407 If you have any questions about accessing data or samples, please email [alspac-data@bristol.ac.uk](mailto:alspac-data@bristol.ac.uk)  
408 (data) or [bbl-info@bristol.ac.uk](mailto:bbl-info@bristol.ac.uk) (samples).

### 409 Competing interests

410 The authors declare that they have no competing interests

### 411 Funding

412 This work was supported by the Elizabeth Blackwell Institute, University of Bristol, with funding  
413 from the Wellcome Trust ISSF3 grant 204813/Z/16/Z. For the purpose of Open Access, the author has  
414 applied a CC BY public copyright licence to any Author Accepted Manuscript version arising from

415 this submission. This work was also supported by funding from the Medical Research  
416 Council/Medical Research Foundation (MRC/MRF grant number MR/S020292/1).  
417 The UK Medical Research Council and Wellcome (Grant ref: 217065/Z/19/Z) and the University of  
418 Bristol provide core support for ALSPAC. This publication is the work of the authors and Naomi  
419 Warne will serve as guarantor for the contents of this paper. A comprehensive list of grants funding is  
420 available on the ALSPAC website ([http://www.bristol.ac.uk/alspac/external/documents/grant-](http://www.bristol.ac.uk/alspac/external/documents/grant-acknowledgements.pdf)  
421 [acknowledgements.pdf](http://www.bristol.ac.uk/alspac/external/documents/grant-acknowledgements.pdf)). This research was specifically funded by Wellcome Trust and MRC,  
422 University of Bristol Faculty Research Director's Discretionary Fund, Elizabeth Blackwell Institute  
423 for Research, University of Bristol (Grant ref: 102215/2/13/2); NIHR (Grant ref: 1215-20011);  
424 Elizabeth Blackwell Institute and Wellcome Trust (Grant refs: PSYC.RJ6220 SSCM.RD1809); MRC  
425 (Grant ref: MR/M006727/1); and NIH (Grant ref: 5R01AA018333-0).

426 The funding sources had no role in the study design, analysis, decision to publish, or preparation of  
427 the manuscript.

#### 428 Authors' contributions

429 All authors were involved in conception and design of the study. NW and JH performed data analysis.  
430 NW wrote the first draft of the manuscript. All authors contributed to interpretation of results. All  
431 authors were involved in critically revising the manuscript for important intellectual content and  
432 approval of the final manuscript.

#### 433 Acknowledgments

434 We are extremely grateful to all the families who took part in this study, the midwives for their help in  
435 recruiting them, and the whole ALSPAC team, which includes interviewers, computer and laboratory  
436 technicians, clerical workers, research scientists, volunteers, managers, receptionists and nurses.

#### 437 References

438 1. Kwong ASF, Pearson RM, Adams MJ, Northstone K, Tilling K, Smith D, et al. Mental health  
439 before and during the COVID-19 pandemic in two longitudinal UK population cohorts. Br J

- 440 Psychiatry. 2020;24:1–10.
- 441 2. Dickerson J, Kelly B, Lockyer B, Bridges S, Cartwright C, Willan K, et al. “When will this  
442 end? Will it end?” the impact of the March-June 2020 UK Covid-19 lockdown response on  
443 mental health: A longitudinal survey of mothers in the Born in Bradford study. medRxiv.  
444 2020;2020.11.30.20239954.
- 445 3. Office for National Statistics. Coronavirus and depression in adults, Great Britain: June 2020  
446 [Internet]. 2020 [cited 2021 Feb 18]. Available from:  
447 <https://www.ons.gov.uk/peoplepopulationandcommunity/wellbeing/articles/coronavirusanddepressioninadultsgreatbritain/june2020>  
448
- 449 4. Pierce M, Hope H, Ford T, Hatch S, Hotopf M, John A, et al. Mental health before and during  
450 the COVID-19 pandemic: a longitudinal probability sample survey of the UK population. The  
451 Lancet Psychiatry. 2020;7(10):883–92.
- 452 5. Warne N, Heron J, Mars B, Moran P, Stewart A, Munafò M, et al. Comorbidity of self-harm  
453 and disordered eating in young people: Evidence from a UK population-based cohort. J Affect  
454 Disord. 2021;282:386–90.
- 455 6. Treasure J, Duarte TA, Schmidt U. Eating disorders. Lancet. 2020;395(10227):899–911.
- 456 7. Arcelus J, Mitchell AJ, Wales J, Nielsen S. Mortality rates in patients with anorexia nervosa  
457 and other eating disorders: A meta-analysis of 36 studies. Arch Gen Psychiatry. 2011  
458 Jul;68(7):724–31.
- 459 8. Hawton K, Saunders KEA, O’Connor RC. Self-harm and suicide in adolescents. Lancet.  
460 2012;379(9834):2373–82.
- 461 9. Skegg K. Self-harm. Lancet. 2005;366(9495):1471–83.
- 462 10. Svirko E, Hawton K. Self-Injurious Behavior and Eating Disorders: The Extent and Nature of  
463 the Association. Suicide Life-Threatening Behav. 2007;37(4):409–21.

- 464 11. Claes L, Jiménez-Murcia S, Agüera Z, Castro R, Sánchez I, Menchón JM, et al. Male eating  
465 disorder patients with and without non-suicidal self-injury: A comparison of  
466 psychopathological and personality features. *Eur Eat Disord Rev.* 2012;20(4):335–8.
- 467 12. Claes L, Vandereycken W, Vertommen H. Eating-disordered patients with and without self-  
468 injurious behaviours: A comparison of psychopathological features. *Eur Eat Disord Rev.*  
469 2003;11(5):379–96.
- 470 13. Wright F, Bewick BM, Barkham M, House AO, Hill AJ. Co-occurrence of self-reported  
471 disordered eating and self-harm in UK university students. *Br J Clin Psychol.* 2009;48(4):397–  
472 410.
- 473 14. Brausch AM, Perkins NM. Nonsuicidal self-injury and disordered eating: Differences in  
474 acquired capability and suicide attempt severity. *Psychiatry Res.* 2018;266:72–8.
- 475 15. Cooper M, Reilly EE, Siegel JA, Coniglio K, Sadeh-Sharvit S, Pisetsky EM, et al. Eating  
476 disorders during the COVID-19 pandemic and quarantine: an overview of risks and  
477 recommendations for treatment and early intervention. *Eat Disord.* 2020;1–23.
- 478 16. Touyz S, Lacey H, Hay P. Eating disorders in the time of COVID-19. *J Eat Disord.*  
479 2020;8(1):19.
- 480 17. Holmes EA, O’Connor RC, Perry VH, Tracey I, Wessely S, Arseneault L, et al.  
481 Multidisciplinary research priorities for the COVID-19 pandemic: a call for action for mental  
482 health science. *The Lancet Psychiatry.* 2020;7(6):547–60.
- 483 18. Kapur N, Clements C, Appleby L, Hawton K, Steeg S, Waters K, et al. Effects of the COVID-  
484 19 pandemic on self-harm. *The Lancet Psychiatry.* 2021;8(2):e4.
- 485 19. Hawton K, Casey D, Bale E, Brand F, Ness J, Waters K, et al. Self-harm during the early  
486 period of the COVID-19 pandemic in England: Comparative trend analysis of hospital  
487 presentations. *J Affect Disord.* 2021 Mar 1;282:991–5.
- 488 20. Phillipou A, Meyer D, Neill E, Tan EJ, Toh WL, Van Rheenen TE, et al. Eating and exercise

- 489 behaviors in eating disorders and the general population during the COVID-19 pandemic in  
490 Australia: Initial results from the COLLATE project. *Int J Eat Disord.* 2020 Jul 1;53(7):1158–  
491 65.
- 492 21. Schlegl S, Maier J, Meule A, Voderholzer U. Eating disorders in times of the COVID-19  
493 pandemic—Results from an online survey of patients with anorexia nervosa. *Int J Eat Disord.*  
494 2020;53(11):1791–800.
- 495 22. Termorshuizen JD, Watson HJ, Thornton LM, Borg S, Flatt RE, MacDermod CM, et al. Early  
496 impact of COVID-19 on individuals with self-reported eating disorders: A survey of ~1,000  
497 individuals in the United States and the Netherlands. *Int J Eat Disord.* 2020;53(11):1780–90.
- 498 23. Fernández-Aranda F, Casas M, Claes L, Bryan DC, Favaro A, Granero R, et al. COVID-19  
499 and implications for eating disorders. *Eur Eat Disord Rev.* 2020;28(3):239–45.
- 500 24. Castellini G, Cassioli E, Rossi E, Innocenti M, Gironi V, Sanfilippo G, et al. The impact of  
501 COVID-19 epidemic on eating disorders: A longitudinal observation of pre versus post  
502 psychopathological features in a sample of patients with eating disorders and a group of  
503 healthy controls. *Int J Eat Disord.* 2020;53(11):1855–62.
- 504 25. Fountoulakis KN, Apostolidou MK, Atsiova MB, Filippidou AK, Florou AK, Gousiou DS, et  
505 al. Self-reported changes in anxiety, depression and suicidality during the COVID-19  
506 lockdown in Greece. *J Affect Disord.* 2021;279:624–9.
- 507 26. Solmi F, Hotopf M, Hatch SL, Treasure J, Micali N. Eating disorders in a multi-ethnic inner-  
508 city UK sample: prevalence, comorbidity and service use. *Soc Psychiatry Psychiatr Epidemiol.*  
509 2016;51(3):369–81.
- 510 27. Boyd A, Golding J, Macleod J, Lawlor DA, Fraser A, Henderson J, et al. Cohort profile:  
511 The 'Children of the 90s'—The index offspring of the Avon Longitudinal Study of Parents and  
512 Children. *Int J Epidemiol.* 2013;42(1):111–27.
- 513 28. Fraser A, Macdonald-wallis C, Tilling K, Boyd A, Golding J, Davey smith G, et al. Cohort

- 514 profile: The avon longitudinal study of parents and children: ALSPAC mothers cohort. *Int J*  
515 *Epidemiol.* 2013;42(1):97–110.
- 516 29. Northstone K, Lewcock M, Groom A, Boyd A, Macleod J, Timpson N, et al. The Avon  
517 Longitudinal Study of Parents and Children (ALSPAC): an update on the enrolled sample of  
518 index children in 2019. *Wellcome Open Res.* 2019;4:51.
- 519 30. Harris PA, Taylor R, Minor BL, Elliott V, Fernandez M, O’Neal L, et al. The REDCap  
520 consortium: Building an international community of software platform partners. *J Biomed*  
521 *Inform.* 2019;95:103208.
- 522 31. Harris PA, Taylor R, Thielke R, Payne J, Gonzalez N, Conde JG. Research electronic data  
523 capture (REDCap)-A metadata-driven methodology and workflow process for providing  
524 translational research informatics support. *J Biomed Inform.* 2009;42(2):377–81.
- 525 32. Northstone K, Smith D, Bowring C, Wells N, Crawford M, Haworth S, et al. The Avon  
526 Longitudinal Study of Parents and Children - A resource for COVID-19 research:  
527 Questionnaire data capture May-July 2020. *Wellcome Open Res.* 2020;5:210.
- 528 33. Northstone K, Howarth S, Smith D, Bowring C, Wells N, Timpson NJ. The Avon  
529 Longitudinal Study of Parents and Children - A resource for COVID-19 research:  
530 Questionnaire data capture April-May 2020. *Wellcome Open Res.* 2020;5:127.
- 531 34. Kann L, Warren CW, Harris WA, Collins JL, Williams BI, Ross JG, et al. Youth Risk  
532 Behavior Surveillance- United States, 1995. *J Sch Health.* 1996;66(10):365–77.
- 533 35. APA. Diagnostic and statistical manual of mental disorders. 5th ed. Washington, DC:  
534 American Psychiatric Association; 2013.
- 535 36. Madge N, Hewitt A, Hawton K, Wilde EJ De, Corcoran P, Fekete S, et al. Deliberate self-  
536 harm within an international community sample of young people: Comparative findings from  
537 the Child & Adolescent Self-harm in Europe (CASE) Study. *J Child Psychol Psychiatry Allied*  
538 *Discip.* 2008;49(6):667–77.

- 539 37. Angold A, Costello EJ, Messer SC, Pickles A, Winder F, Silver D. The development of a short  
540 questionnaire for use in epidemiological studies of depression in children and adolescents. *Int J*  
541 *Methods Psychiatr Res.* 1995;5(5):237–49.
- 542 38. Spitzer RL, Kroenke K, Williams JBW, Löwe B. A brief measure for assessing generalized  
543 anxiety disorder: The GAD-7. *Arch Intern Med.* 2006;166(10):1092–7.
- 544 39. Tennant R, Hiller L, Fishwick R, Platt S, Joseph S, Weich S, et al. The Warwick-Edinburgh  
545 mental well-being scale (WEMWBS): Development and UK validation. *Health Qual Life*  
546 *Outcomes.* 2007;5(1):63.
- 547 40. StataCorp. *Stata Statistical Software: Release 16.* College Station, TX: StataCorp LLC; 2019.
- 548 41. Royston P, White IR. Multiple Imputation by Chained Equations (MICE): Implementation in  
549 *Stata.* *J Stat Softw.* 2011;45(4):1–20.
- 550 42. Tilling K, Williamson EJ, Spratt M, Sterne JAC, Carpenter JR. Appropriate inclusion of  
551 interactions was needed to avoid bias in multiple imputation. *J Clin Epidemiol.* 2016 Dec  
552 1;80:107–15.
- 553 43. Mansfield KE, Mathur R, Tazare J, Henderson AD, Mulick AR, Carreira H, et al. Indirect  
554 acute effects of the COVID-19 pandemic on physical and mental health in the UK: a  
555 population-based study. *Lancet Digit Heal.* 2021;3(4):e217–30.
- 556



Table 1. Descriptive information on imputed and observed samples

|                                                              | Imputed sample                    |        | Observed sample                  |             |                                  |           |                                  |           |
|--------------------------------------------------------------|-----------------------------------|--------|----------------------------------|-------------|----------------------------------|-----------|----------------------------------|-----------|
|                                                              |                                   |        | Total sample                     |             | Any disordered eating            |           | Any self-harm eating             |           |
|                                                              | <i>Sample mean (SE) or % (SE)</i> |        | <i>Sample mean (SE) or % (n)</i> |             | <i>Sample mean (SE) or % (n)</i> |           | <i>Sample mean (SE) or % (n)</i> |           |
| Sex (female)                                                 |                                   |        | 71.17%                           | (1891/2657) | 84.52%                           | (557/659) | 85.41%                           | (158/185) |
| Ethnicity (non-white)                                        | 3.50%                             | (0.37) | 3.42%                            | (87/2542)   | 3.06%                            | (19/621)  | **                               | **        |
| Not in education, employment or training before the pandemic | 5.36%                             | (0.53) | 5.04%                            | (100/1986)  | 5.83%                            | (32/549)  | 5.92%                            | (9/152)   |
| Living alone in the pandemic                                 |                                   |        | 7.20%                            | (139/1931)  | 9.18%                            | (46/501)  | 9.46%                            | (14/148)  |
| Keyworker in the pandemic                                    |                                   |        | 39.66%                           | (742/1871)  | 41.02%                           | (201/490) | 33.79%                           | (49/145)  |
| Furloughed during the pandemic                               |                                   |        | 12.31%                           | (327/2657)  | 12.29%                           | (81/659)  | 15.14%                           | (28/185)  |
| Financial problems during the pandemic                       |                                   |        | 24.61%                           | (474/1926)  | 27.15%                           | (136/501) | 25.68%                           | (38/148)  |
| Any disordered eating                                        | 32.04%                            | (1.01) | 31.44%                           | (659/2096)  |                                  |           |                                  |           |
| Fasting                                                      |                                   |        | 10.78%                           | (228/2115)  |                                  |           |                                  |           |
| Purging                                                      |                                   |        | 9.04%                            | (191/2112)  |                                  |           |                                  |           |
| Binge-eating                                                 |                                   |        | 20.46%                           | (433/2116)  |                                  |           |                                  |           |
| Excessive exercise                                           |                                   |        | 3.52%                            | (74/2105)   |                                  |           |                                  |           |

|                                          |       |        |            |            |                           |
|------------------------------------------|-------|--------|------------|------------|---------------------------|
| DSM-5 disordered eating                  |       | 9.75%  | (204/2093) |            |                           |
| Any self-harm                            | 8.97% | (0.61) | 8.75%      | (185/2115) |                           |
| Self-harm without suicidal intent        |       |        | 6.19%      | (131/2115) |                           |
| Self-harm with suicidal intent           |       |        | 1.68%      | (35/2081)  |                           |
| Comorbid disordered eating and self-harm | 5.53% | (0.50) | 5.36%      | (112/2089) |                           |
| Depressive symptoms during the pandemic  | 6.44  | (0.12) | 6.46       | (0.13)     | 8.56 (0.29) 11.20 (0.58)  |
| Anxiety symptoms during the pandemic     | 6.04  | (0.11) | 6.04       | (0.12)     | 7.68 (0.25) 9.99 (0.50)   |
| Mental wellbeing during the pandemic     | 44.26 | (0.18) | 44.24      | (0.20)     | 41.78 (0.40) 38.79 (0.75) |
| Baseline depressive symptoms             | 6.90  | (0.13) | 6.85       | (0.13)     | 9.16 (0.28) 12.88 (0.57)  |
| Baseline anxiety symptoms                | 4.64  | (0.10) | 4.54       | (0.11)     | 6.14 (0.23) 7.99 (0.44)   |
| Baseline mental wellbeing                | 48.73 | (0.19) | 48.81      | (0.20)     | 46.10 (0.40) 41.05 (0.75) |

---

*Note:* Asterisks (“\*\*”) indicate that estimates were reliant on cells containing five individuals or fewer. It is an ALSPAC stipulation that such data are not tabulated due to difficulties in maintaining participant anonymity for such rare characteristics. Descriptive information is only provided for variables included in the imputed datasets (i.e. those included in the main analysis).

Table 2. Association between disordered eating and self-harm exposures and pandemic mental health and wellbeing outcomes

| Exposure                                 | Unadjusted Model A   |       | Adjusted Model B     |       | Fully Adjusted Model C |       |
|------------------------------------------|----------------------|-------|----------------------|-------|------------------------|-------|
|                                          | B (95% CI)           | p     | B (95% CI)           | p     | B (95% CI)             | p     |
| <i>Outcome: Depressive symptoms</i>      |                      |       |                      |       |                        |       |
| Disordered eating                        | 2.98 (2.44, 3.53)    | <.001 | 2.72 (2.17, 3.27)    | <.001 | 1.37 (0.84, 1.90)      | <.001 |
| Self-harm                                | 5.19 (4.31, 6.08)    | <.001 | 4.95 (4.07, 5.83)    | <.001 | 2.13 (1.24, 3.01)      | <.001 |
| Comorbid disordered eating and self-harm | 6.15 (5.02, 7.29)    | <.001 | 5.87 (4.74, 7.00)    | <.001 | 2.52 (1.38, 3.66)      | <.001 |
| <i>Outcome: Anxiety symptoms</i>         |                      |       |                      |       |                        |       |
| Disordered eating                        | 2.43 (1.92, 2.95)    | <.001 | 2.11 (1.59, 2.63)    | <.001 | 1.24 (0.74, 1.74)      | <.001 |
| Self-harm                                | 4.55 (3.74, 5.36)    | <.001 | 4.26 (3.46, 5.05)    | <.001 | 2.69 (1.87, 3.50)      | <.001 |
| Comorbid disordered eating and self-harm | 5.38 (4.30, 6.47)    | <.001 | 5.05 (3.98, 6.12)    | <.001 | 3.08 (2.01, 4.15)      | <.001 |
| <i>Outcome: Mental wellbeing</i>         |                      |       |                      |       |                        |       |
| Disordered eating                        | -3.49 (-4.30, -2.67) | <.001 | -3.35 (-4.18, -2.51) | <.001 | -1.82 (-2.59, -1.06)   | <.001 |
| Self-harm                                | -5.78 (-7.06, -4.50) | <.001 | -5.62 (-6.90, -4.33) | <.001 | -2.18 (-3.43, -0.93)   | <.001 |
| Comorbid disordered eating and self-harm | -7.81 (-9.43, -6.19) | <.001 | -7.60 (-9.21, -6.00) | <.001 | -3.64 (-5.19, -2.09)   | <.001 |

Results using imputed data (n=2657). Model A = unadjusted; Model B = adjusted for sex, COVID1 questionnaire completion date and pre-pandemic socioeconomic status; Model C = adjusted for sex, COVID questionnaire completion date, pre-pandemic socioeconomic status and baseline mental health and wellbeing measures.

**Figure 1.** Timeline of ALSPAC assessments

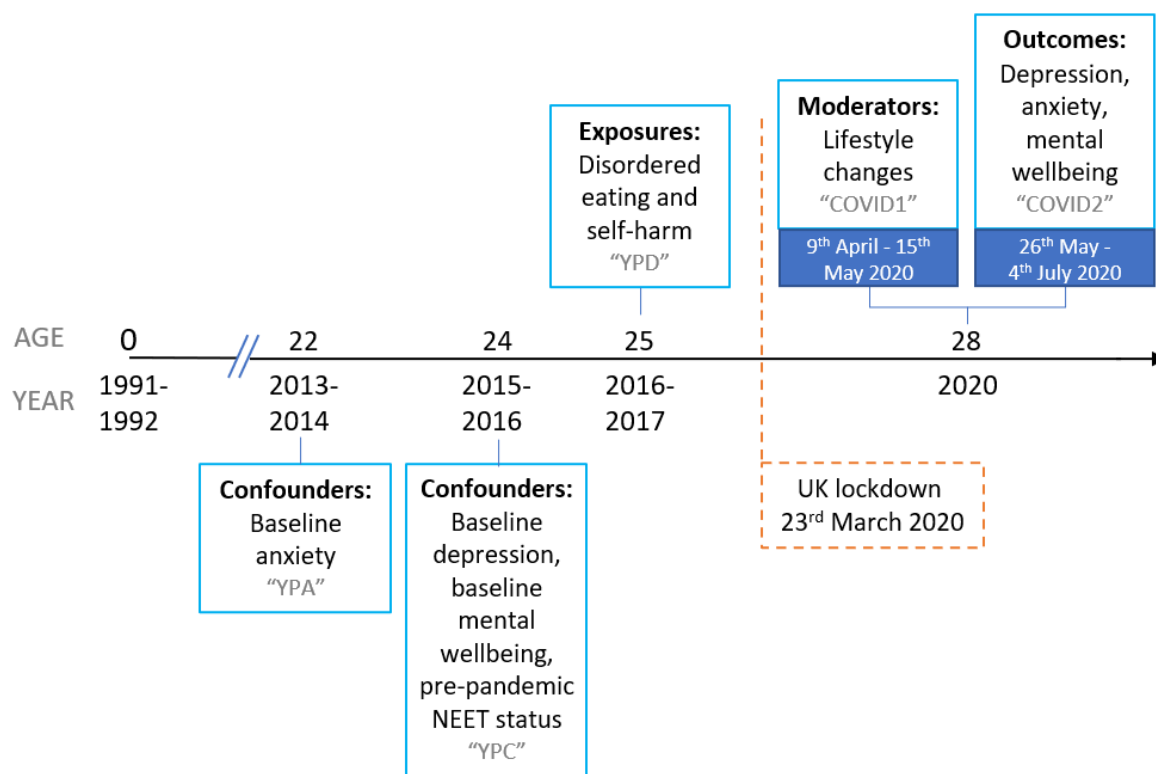

NEET = Not in education, employment or training. Grey text indicates the name of the ALSPAC questionnaire.

**Figure 2.** Adjusted associations between disordered eating/self-harm and mental health and wellbeing stratified by moderators (lifestyle changes)

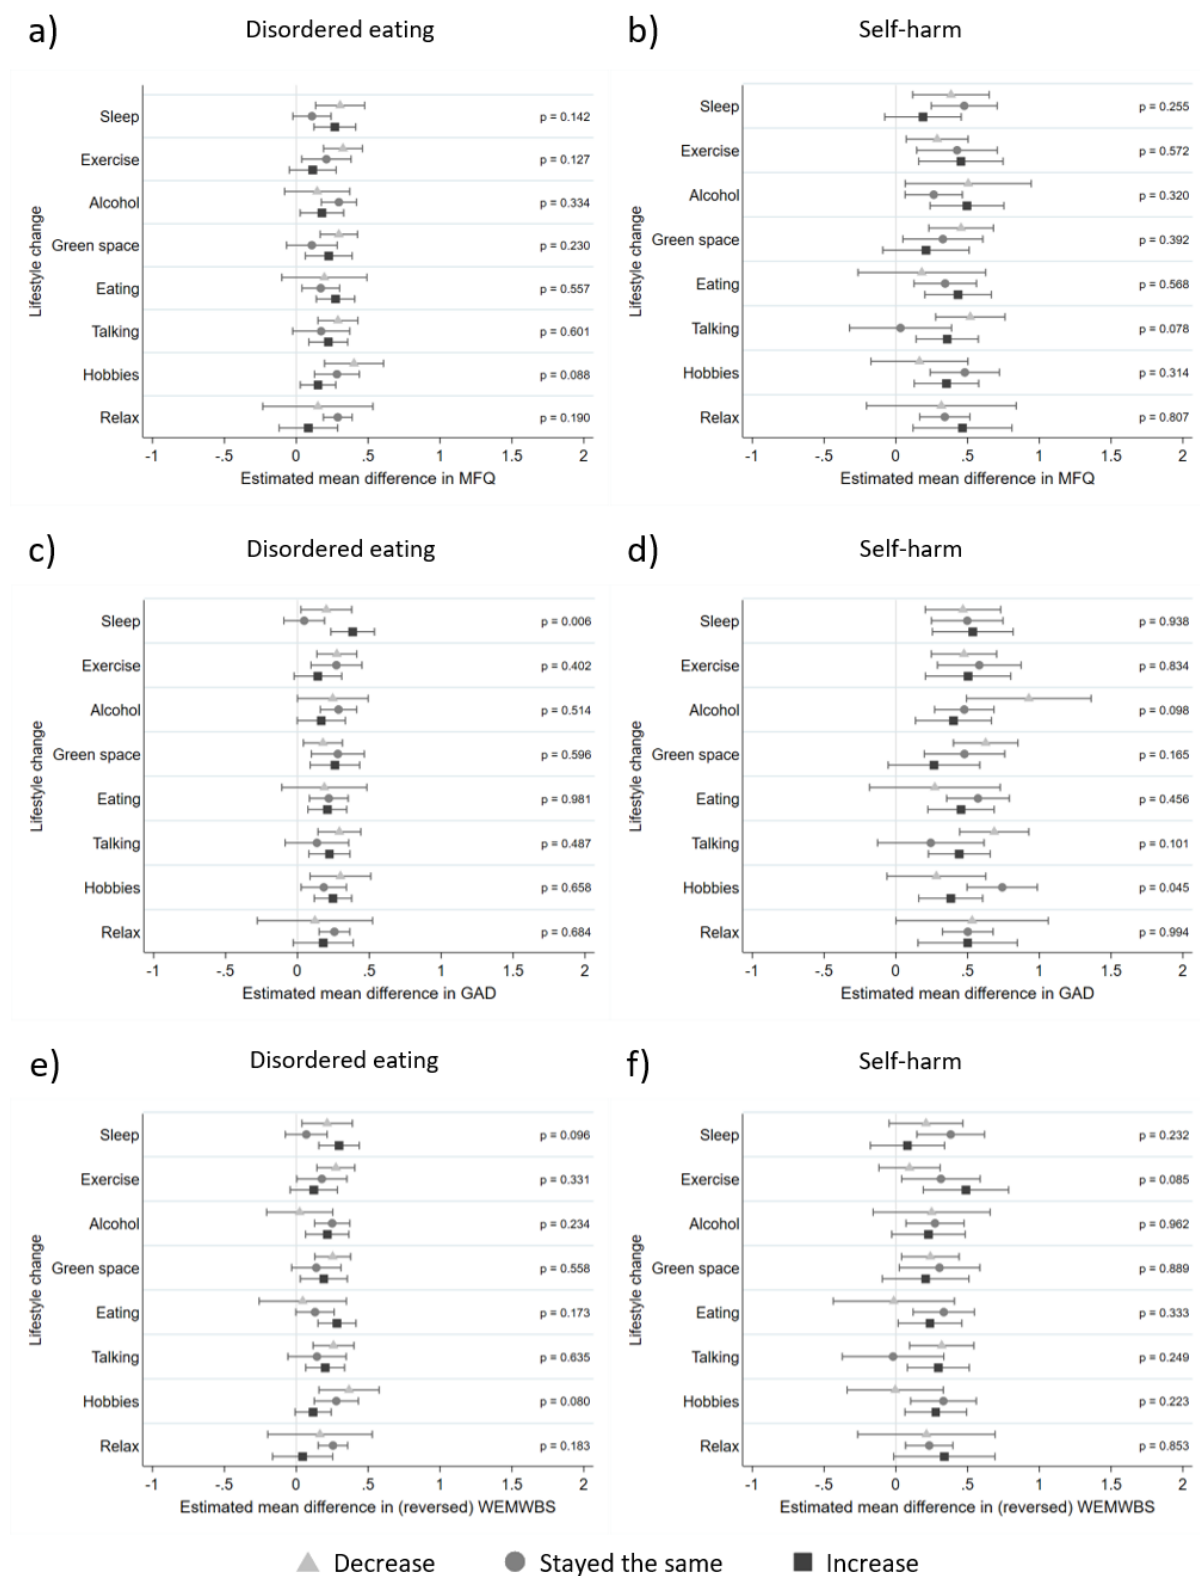

Panel a) Association between disordered eating and depressive symptoms, stratified by moderators;  
Panel b) Association between self-harm and depressive symptoms, stratified by moderators; Panel c)  
association between disordered eating and anxiety symptoms, stratified by moderators; Panel d)  
association between self-harm and anxiety symptoms, stratified by moderators; Panel e) association  
between disordered eating and mental wellbeing, stratified by moderators; Panel f) association  
between self-harm and mental wellbeing, stratified by moderators. All associations were adjusted for  
sex, date of completion for COVID questionnaires, pre-pandemic NEET (not in education,  
employment or training) status and baseline symptoms.

Results using imputed data (n=2657). P values displayed are for the interactions between exposure  
and moderator on mental health and wellbeing outcomes.

MFQ = Mood and Feelings Questionnaire for depressive symptoms

GAD = Generalised Anxiety Disorder 7-item questionnaire for anxiety symptoms

WEMWBS = Warwick-Edinburgh Mental Well-Being Scale for mental wellbeing
